# Supplementary material
Source: bioRxiv or medRxiv preprint supplement (https://medrxiv.org/highwire/filestream/88498/field_highwire_adjunct_files/1/2020.07.01.20105379-2.pdf)
Supplement: Supplementary file [file 2020.07.01.20105379-2.pdf]

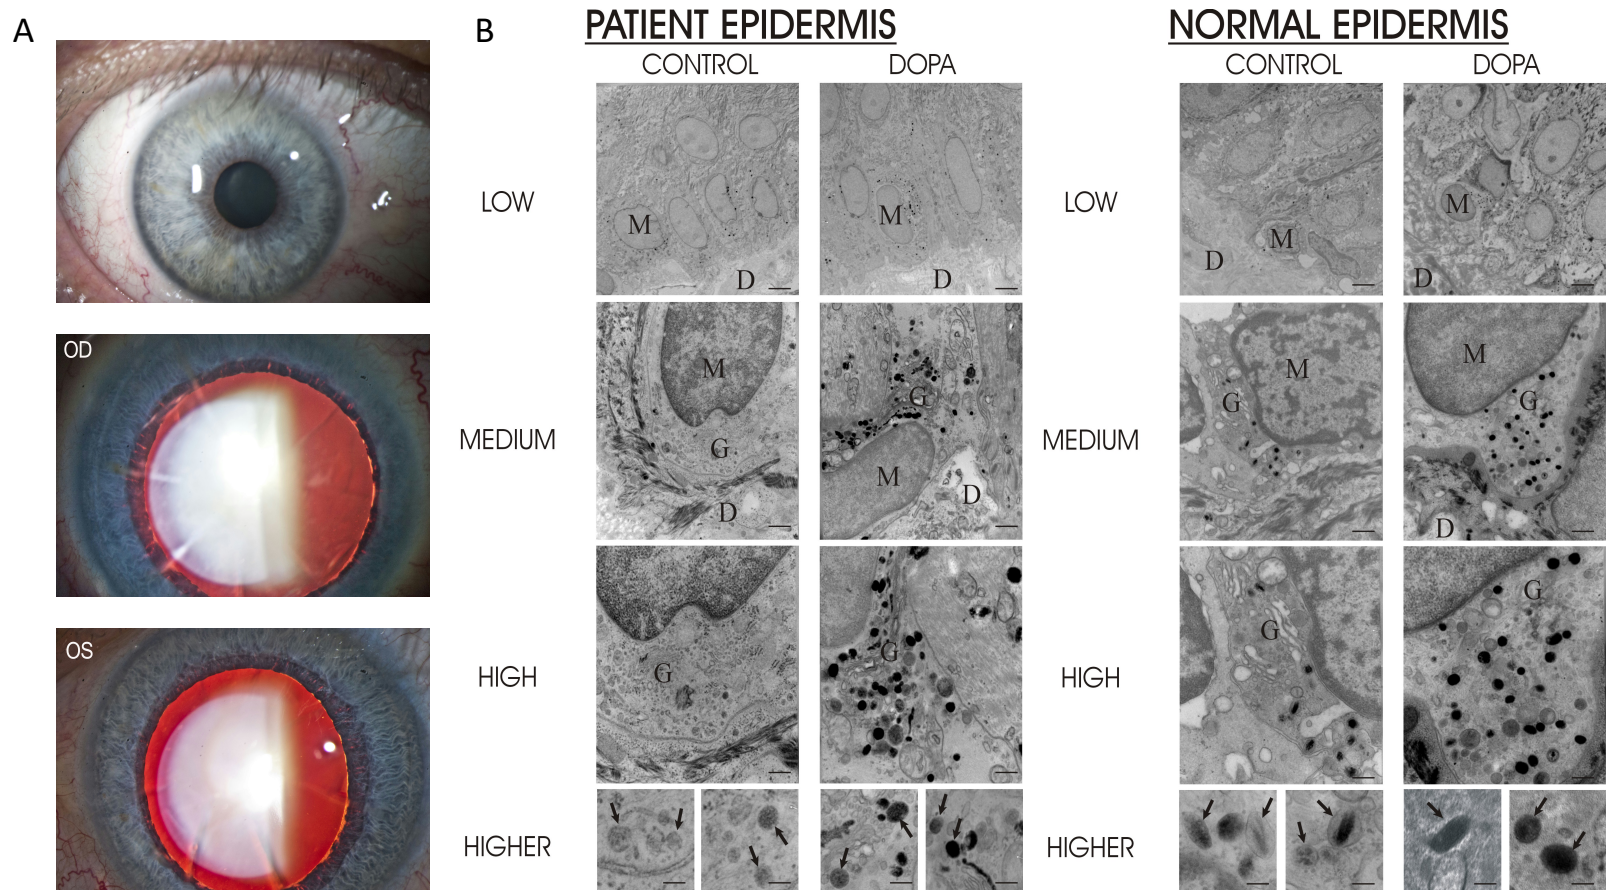

**Figure S1. Albinism evaluation.** (A) Multiple transillumination defects of the iris consistent with a form of ocular albinism. (B) Scalp biopsy was cut longitudinally into 6 segments to be processed for electron microscopy. After initial fixation with Karnovsky's fixative half of the segments were treated histochemically with a 0.1% DOPA (DOPA) for 4 hours and the other half remained in buffer (CONTROL). Controls demonstrated minimal pigmentation in the epidermis (arrows) and well pigmented hair shafts and anagen bulbs (arrowheads). In contrast, DOPA incubation induced much melanin reaction product in the epidermis (arrows) without any apparent increase in pigmentation of the anagen hair bulbs (arrowheads).
